# Supplementary material for: Adipokines in Pregnancy: A Systematic Review of Clinical Data
Source: MDPI journal article supplement (doi:10.3390/biomedicines11051419), 2023-05-11
Supplement: s1 [file s1]

| Reference<br>Nr. | Author                  | Year | Paper Title                                                                                                                        | Study type                      |
|------------------|-------------------------|------|------------------------------------------------------------------------------------------------------------------------------------|---------------------------------|
| [11]             | Al-Musharaf, S., et al. | 2021 | Inflammatory and Adipokine Status from Early to Midpregnancy in Arab Women and Its Associations with Gestational Diabetes Mellitus | Multi-center prospective study  |
| [12]             | Banjac, G., et al.      | 2021 | The role of resistin in early preeclampsia prediction                                                                              | Prospective cohort study        |
| [13]             | Guelfi, K., et al       | 2017 | Maternal circulating adipokine profile and insulin resistance in women at high risk of developing gestational diabetes mellitus    | Randomized controlled trial     |
| [16]             | Lobo, T., et al         | 2019 | Adipokine levels in overweight women with early-onset gestational diabetes mellitus                                                | Nested case-control study       |
| [17]             | Boyadzhieva, M., et al  | 2013 | Adipocytokines during pregnancy and postpartum in women with gestational diabetes and healthy controls                             | Cohort study                    |
| [18]             | Karatas, A., et al.     | 2014 | Relationship of maternal serum resistin and visfatin levels with gestational diabetes mellitus                                     | Case-control study              |
| [19]             | Nanda, S., et al.       | 2012 | Maternal serum resistin at 11 to 13 weeks' gestation in normal and pathological pregnancies                                        | Prospective cohort study        |
| [20]             | O'Malley, E., et al.    | 2020 | The use of biomarkers at the end of the second trimester to predict Gestational Diabetes Mellitus                                  | Prospective observational study |
| [21]             | Lobo, T                 | 2013 | Resistin concentration and gestational diabetes: A systematic review of the literature                                             | Meta-Analysis                   |
| [22]             | Siddiqui, K., et al.    | 2018 | Serum adipokines (adiponectin and resistin) correlation in developing gestational diabetes mellitus: pilot study                   | Case-control study              |
| [23]             | Shang, M., et al.       | 2018 | Correlation of adipokines and markers of oxidative stress in women with gestational diabetes mellitus and their newborns           | Prospective cohort study        |

|      |                            |      |                                                                                                                                                                                                 |                                             |
|------|----------------------------|------|-------------------------------------------------------------------------------------------------------------------------------------------------------------------------------------------------|---------------------------------------------|
| [24] | Bawah, A., et al.          | 2019 | Leptin, resistin and visfatin as useful predictors of gestational diabetes mellitus                                                                                                             | Case-control study                          |
| [25] | Kapustin, R., et al.       | 2020 | Maternal serum leptin, adiponectin, resistin and monocyte chemoattractant protein-1 levels in different types of diabetes mellitus.                                                             | Longitudinal prospective cohort study       |
| [26] | Vorobjova, T., et al.      | 2022 | FABP4 and I-FABP Levels in Pregnant Women Are Associated with Body Mass Index but Not Gestational Diabetes                                                                                      | Cohort study                                |
| [27] | McManus, R., et al.        | 2014 | Maternal, umbilical arterial and umbilical venous 25-hydroxyvitamin D and adipocytokine concentrations in pregnancies with and without gestational diabetes                                     | Case-control study                          |
| [28] | Aviram, A., et al.         | 2020 | The association between adipocytokines and glycemic control in women with gestational diabetes mellitus                                                                                         | Prospective observational trial             |
| [29] | Seol, H., et al.           | 2010 | Comparison of serum levels and the placental expression of resistin between patients with preeclampsia and normal pregnant women                                                                | Cohort study                                |
| [30] | Song, Y., et al.           | 2016 | Serum levels of leptin, adiponectin and resistin in relation to clinical characteristics in normal pregnancy and preeclampsia                                                                   | Case-control study                          |
| [31] | Talab, A., et al.          | 2021 | Antepartum and postpartum changes in adipokines, endothelial dysfunction, inflammatory markers and other biochemical parameters in preeclamptic women: A prospective observational cohort study | Prospective observational cohort study      |
| [32] | Chandrasekaran, S., et al. | 2020 | Adipokine profiles in preeclampsia                                                                                                                                                              | Case-control study                          |
| [33] | Chandrasekaran, S., et al. | 2020 | Evaluating Relationships between Visceral Fat Measures and Adipokines Concentrations among Women with a History of Preeclampsia                                                                 | Secondary analysis of cross-sectional study |
| [34] | Tsiotra, P., et al.        | 2018 | Circulating adipokines and mRNA expression in adipose tissue and the placenta in women with gestational diabetes mellitus                                                                       | Cohort study                                |

|      |                          |      |                                                                                                                                                |                                     |
|------|--------------------------|------|------------------------------------------------------------------------------------------------------------------------------------------------|-------------------------------------|
| [35] | Ebert, T., et al.        | 2020 | Adipocytokines are not associated with gestational diabetes mellitus but with pregnancy status                                                 | Cross-sectional cohort study        |
| [36] | Yang, X.,                | 2017 | Serum chemerin level during the first trimester of pregnancy and the risk of gestational diabetes mellitus                                     | Cross-sectional study, cohort study |
| [37] | Hare, K., et al.         | 2014 | Decreased plasma chemerin levels in women with gestational diabetes mellitus                                                                   | Case-control study                  |
| [38] | Van Poppel, M., et al.   | 2014 | Cord blood chemerin: Differential effects of gestational diabetes mellitus and maternal obesity                                                | Observational, longitudinal study   |
| [40] | Sun, J., et al.          | 2020 | Circulating apelin, chemerin and omentin levels in patients with gestational diabetes mellitus: A systematic review and meta-Analysis          | Meta-analysis                       |
| [39] | Zhou, Z., et al.         | 2018 | Circulating chemerin levels and gestational diabetes mellitus: A systematic review and meta-analysis                                           | Meta-analysis                       |
| [41] | Fatima, S., et al.       | 2017 | Elevated levels of chemerin, leptin, and interleukin-18 in gestational diabetes mellitus                                                       | Cohort study                        |
| [42] | Francis, E., et al.      | 2020 | Adipokines in early and mid-pregnancy and subsequent risk of gestational diabetes: A longitudinal study in a multiracial cohort                | Longitudinal cohort study           |
| [43] | Mierzyński, R., et al.   | 2021 | The Potential Role of Chemerin, Lipocalin 2, and Apelin in the Diagnosis and Pathophysiology of Gestational Diabetes Mellitus                  | Cohort study                        |
| [44] | Li, X., et al.           | 2015 | Chemerin expression in Chinese pregnant women with and without gestational diabetes mellitus                                                   | Cohort study                        |
| [45] | Schuitemaker, J., et al. | 2020 | First trimester secreted Frizzled-Related Protein 4 and other adipokine serum concentrations in women developing gestational diabetes mellitus | Nested case-control study           |

|      |                     |      |                                                                                                                                                            |                                   |
|------|---------------------|------|------------------------------------------------------------------------------------------------------------------------------------------------------------|-----------------------------------|
| [46] | Mosavat, M., et al. | 2021 | Adipocyte-Specific Fatty Acid-Binding Protein (AFABP) and Chemerin in Association with Gestational Diabetes: A Case-Control Study                          | Case-control study                |
| [47] | Stepan, H., et al.  | 2011 | Serum levels of the adipokine chemerin are increased in preeclampsia during and 6months after pregnancy                                                    | Case-control study                |
| [48] | Duan, D., et al.    | 2012 | Serum levels of the adipokine chemerin in preeclampsia                                                                                                     | Case-control study                |
| [49] | Cetin, O., et al.   | 2017 | Chemerin level in pregnancies complicated by preeclampsia and its relation with disease severity and neonatal outcomes                                     | Cohort study                      |
| [50] | Chen, Y., et al.    | 2023 | Third-Trimester Maternal Serum Chemerin and Hypertension After Preeclampsia: A Prospective Cohort Study.                                                   | Prospective cohort study          |
| [51] | Xu, Q., et al.      | 2014 | The predictive value of the first-trimester maternal serum chemerin level for pre-eclampsia                                                                | Prospective cross-sectional study |
| [54] | Zhang, Y., et al    | 2016 | Changes in serum adipocyte fatty acid-binding protein in women with gestational diabetes mellitus and normal pregnant women during mid- and late pregnancy | Prospective cohort study          |
| [55] | Abetew, D., et al.  | 2013 | Association of retinol binding protein 4 with risk of gestational diabetes                                                                                 | Cohort study                      |
| [56] | Du, C., et al.      | 2019 | A prospective study of maternal plasma concentrations of retinol-binding protein 4 and risk of gestational diabetes mellitus                               | Prospective observational study   |
| [57] | Hu, S., et al.      | 2016 | Serum level and polymorphisms of retinol-binding protein-4 and risk for gestational diabetes mellitus: A meta-analysis                                     | Meta-analysis                     |
| [58] | Huang, Q., et al.   | 2015 | Circulating retinol-binding protein 4 levels in gestational diabetes mellitus: A meta-analysis of observational studies                                    | Meta-analysis                     |
| [59] | Nanda, S., et al.   | 2013 | Maternal serum retinol-binding protein-4 at 11-13 weeks' gestation in normal and pathological pregnancies                                                  | Cohort study                      |

|      |                        |      |                                                                                                                                                                        |                                  |
|------|------------------------|------|------------------------------------------------------------------------------------------------------------------------------------------------------------------------|----------------------------------|
| [60] | Jia, X., et al.        | 2022 | The relationship between serum adipokine fibroblast growth factor-21 and gestational diabetes mellitus                                                                 | Cohort study                     |
| [61] | Gursoy, A., et al.     | 2015 | Early second trimester retinol-binding protein-4 values in cases with or without gestational diabetes mellitus risk factors: A cross-sectional study                   | Cross-sectional study            |
| [63] | Seol, H., et al.       | 2011 | Retinol-binding protein-4 is decreased in patients with preeclampsia in comparison with normal pregnant women.                                                         | Case-control study               |
| [64] | Yliniemi, A., et al.   | 2015 | First trimester placental retinol-binding protein 4 (RBP4) and pregnancy-associated placental protein A (PAPP-A) in the prediction of early-onset severe pre-eclampsia | Case-control study               |
| [65] | Mendola, O., et al.    | 2017 | Retinol-binding protein 4 and lipids prospectively measured during early to mid-pregnancy in relation to preeclampsia and preterm birth risk                           | Observational longitudinal study |
| [66] | Vaisbuch, E., et al.   | 2010 | Retinol binding protein 4 - A novel association with early-onset preeclampsia                                                                                          | Cross-sectional study            |
| [67] | Hamdan, H., et al.     | 2020 | Association between Retinol-Binding Protein 4 Levels and Preeclampsia: A Systematic Review and Meta-Analysis                                                           | Meta-analysis                    |
| [68] | Fruscalzo, A., et al.  | 2013 | Retinol binding protein as early marker of fetal growth restriction in first trimester maternal serum                                                                  | case-control study               |
| [69] | Zhang, Y., et al.      | 2018 | Association between plasma retinol binding protein 4 levels and severe preeclampsia                                                                                    | Case-control study               |
| [70] | Palalioglu, R., et al. | 2023 | Evaluation of maternal serum SERPINC1, E-selectin, P-selectin, RBP4 and PP13 levels in pregnancies complicated with preeclampsia                                       | Prospective cohort study         |
| [71] | Masuyama, H., et al.   | 2011 | Retinol-binding protein 4 and insulin resistance in preeclampsia                                                                                                       | Case-control study               |

|      |                             |      |                                                                                                                                      |                           |
|------|-----------------------------|------|--------------------------------------------------------------------------------------------------------------------------------------|---------------------------|
| [72] | Fruscalzo, A., et al.       | 2017 | First trimester TTR-RBP4-ROH complex and angiogenic factors in the prediction of small for gestational age infant's outcome          | Case-control study        |
| [73] | Yang, M., et al.            | 2020 | Sex dimorphism in the associations of gestational diabetes with cord blood adiponectin and retinol-binding protein 4                 | Nested case-control study |
| [74] | Yang, M., et al.            | 2020 | Retinol-binding protein 4, fetal overgrowth and fetal growth                                                                         | Case-control study        |
| [76] | Chen, Q., et al.            | 2016 | Serum levels of GDF15 are reduced in preeclampsia and the reduction is more profound in late-onset than early-onset cases            | Case-control study        |
| [77] | Wertaschnigg, D., et al.    | 2020 | Second- and third-trimester serum levels of growth-differentiation factor-15 in prediction of pre-eclampsia                          | Case-control study        |
| [78] | Yakut, K., et al.           | 2021 | Is GDF-15 level associated with gestational diabetes mellitus and adverse perinatal outcomes?                                        | Case-control study        |
| [79] | Cruickshank, T., et al.     | 2021 | Circulating growth differentiation factor 15 is increased preceding preeclampsia diagnosis: Implications as a disease biomarker      | Prospective cohort study  |
| [80] | Yuksel, I., et al.          | 2018 | Maternal levels of growth differentiation factor-15 in patients with preeclampsia                                                    | Cross-sectional study     |
| [81] | Diaz, M., et al.            | 2020 | Circulating growth-and-differentiation factor-15 in early life: relation to prenatal and postnatal growth and adiposity measurements | Cohort study              |
| [83] | Garcés, M., et al.          | 2014 | Irisin levels during pregnancy and changes associated with the development of preeclampsia                                           | Prospective cohort study  |
| [84] | Ebert, T., et al.           | 2014 | Serum levels of irisin in gestational diabetes mellitus during pregnancy and after delivery                                          | Case-control study        |
| [85] | Hernandez-Trejo, M., et al. | 2016 | Relationship between irisin concentration and serum cytokines in mother and newborn                                                  | Cohort study              |

|       |                        |      |                                                                                                                            |                                |
|-------|------------------------|------|----------------------------------------------------------------------------------------------------------------------------|--------------------------------|
| [86]  | Kuzmicki, M., et al.   | 2014 | Serum irisin concentration in women with gestational diabetes                                                              | Case-control study             |
| [87]  | Ökdemir, D., et al.    | 2018 | The Role of Irisin, Insulin and Leptin in Maternal and Fetal Interaction                                                   | Cohort study                   |
| [91]  | Sun, J., et al.        | 2020 | Circulating FABP4, nesfatin-1, and osteocalcin concentrations in women with gestational diabetes mellitus: A meta-analysis | Meta-analysis                  |
| [92]  | Lin, Y., et al.        | 2018 | Study on the correlation between adipocyte fatty-acid binding protein, glucolipid metabolism, and pre-eclampsia            | Cohort study                   |
| [93]  | Ciborowski, M., et al. | 2014 | Potential first trimester metabolomic biomarkers of abnormal birth weight in healthy pregnancies                           | Cross-sectional study          |
| [94]  | Joung, K., et al.      | 2017 | Cord Blood Adipocyte Fatty Acid-Binding Protein Levels Correlate With Gestational Age and Birth Weight in Neonates         | Cross-sectional study          |
| [95]  | Ron, I., et al.        | 2021 | The adipokine FABP4 is a key regulator of neonatal glucose homeostasis                                                     | Cohort study                   |
| [96]  | Liu, X., et al.        | 2021 | Sex Dimorphic Associations of Gestational Diabetes Mellitus With Cord Plasma Fatty Acid Binding Protein 4 and Estradiol    | Nested case-control study      |
| [98]  | Aktas, G., et al.      | 2014 | Association between omentin levels and insulin resistance in pregnancy                                                     | Cohort study                   |
| [99]  | Franz, M., et al.      | 2018 | Maternal and neonatal omentin-1 levels in gestational diabetes                                                             | Prospective case-control study |
| [100] | Mierzyński, R., et al. | 2018 | Adiponectin and omentin levels as predictive biomarkers of preterm birth in patients with gestational diabetes mellitus    | Cohort study                   |
| [101] | Abell, S., et al.      | 2017 | The association between dysregulated adipocytokines in early pregnancy and development of gestational diabetes             | Randomized trial               |

|       |                                  |      |                                                                                                                                                                                 |                                  |
|-------|----------------------------------|------|---------------------------------------------------------------------------------------------------------------------------------------------------------------------------------|----------------------------------|
| [102] | Abell, S., et al.                | 2019 | Role of serum biomarkers to optimise a validated clinical risk prediction tool for gestational diabetes                                                                         | Randomized trial                 |
| [103] | Souvannavong-Vilivong, X., et al | 2019 | Placental expressions and serum levels of adiponectin, visfatin, and omentin in GDM                                                                                             | Prospective cohort study         |
| [104] | Pan, X., et al.                  | 2019 | Omentin-1 in diabetes mellitus: A systematic review and meta-analysis                                                                                                           | Meta-analysis                    |
| [105] | Papatheodorou, S., et al.        | 2022 | Association between omentin-1 and indices of glucose metabolism in early pregnancy: a pilot study                                                                               | Cohort study                     |
| [107] | Liu, H., et al.                  | 2015 | Association of serum omentin-1 concentrations with the presence and severity of preeclampsia                                                                                    | Cross-sectional study            |
| [108] | Briana, D., et al.               | 2011 | Omentin-1 and vaspin are present in the fetus and neonate, and perinatal concentrations are similar in normal and growth-restricted pregnancies                                 | Case-control study               |
| [109] | Hernández-Rodríguez, C., et al.  | 2019 | Differences in omentin-1 levels in term newborns according to birth weight                                                                                                      | Secondary analysis, cohort study |
| [111] | Sweeting, A. et al.              | 2019 | A Novel Early Pregnancy Risk Prediction Model for Gestational Diabetes Mellitus                                                                                                 | Prospective cohort study         |
| [112] | Stepan, H., et al.               | 2010 | Serum levels of the adipokine lipocalin-2 are increased in preeclampsia                                                                                                         | Case-control study               |
| [113] | Li, L., et al.                   | 2021 | Expression and significance of serum soluble fms-like tyrosine kinase 1 (sFlt-1), CXC chemokine ligand 16 (CXCL16), and lipocalin 2 (LCN-2) in pregnant women with preeclampsia | Case-control study               |
| [114] | Papathanasiou, A., et al.        | 2021 | Perinatal lipocalin-2 profile at the extremes of fetal growth                                                                                                                   | Cross-sectional study            |
| [117] | Jiang, Y., et al.                | 2021 | Visfatin level and gestational diabetes mellitus: a systematic review and meta-analysis,                                                                                        | Meta-analysis                    |

|       |                             |      |                                                                                                                                                                   |                                |
|-------|-----------------------------|------|-------------------------------------------------------------------------------------------------------------------------------------------------------------------|--------------------------------|
| [118] | Zhang, W., et al.           | 2018 | Association between circulating visfatin and gestational diabetes mellitus: a systematic review and meta-analysis                                                 | Meta-analysis                  |
| [119] | Park, S., et al.            | 2013 | Gestational diabetes is associated with high energy and saturated fat intakes and with low plasma visfatin and adiponectin levels independent of prepregnancy BMI | Cohort study                   |
| [120] | Liang, Z., et al.           | 2016 | Correlations of serum visfatin and metabolisms of glucose and lipid in women with gestational diabetes mellitus                                                   | Prospective case-control study |
| [121] | Kaygusuz, I., et al.        | 2013 | Serum levels of visfatin and possible interaction with iron parameters in gestational diabetes mellitus                                                           | Cohort study                   |
| [122] | Lorenzo-Almorós, A., et al. | 2019 | A clinical research study on the respective relationships between visfatin and human fetuin A and pregnancy outcomes in gestational diabetes mellitus             | Cohort study                   |
| [123] | Molȩda, I., et al.         | 2016 | Adipokines and $\beta$ -cell dysfunction in normoglycemic women with previous gestational diabetes mellitus                                                       | Case-control study             |
| [124] | Mazaki-Tovi, S., et al.     | 2010 | Could alterations in maternal plasma visfatin concentration participate in the phenotype definition of preeclampsia and SGA?                                      | Cross-sectional study          |
| [125] | Mazaki-Tovi, S., et al.     | 2010 | Maternal and neonatal circulating visfatin concentrations in patients with pre-eclampsia and a small-for-gestational age neonate                                  | Case-control study             |
| [126] | Zulfikaroglu, E., et al.    | 2010 | Plasma visfatin levels in preeclamptic and normal pregnancies                                                                                                     | Cohort study                   |
| [127] | Ferreira, A., et al.        | 2013 | Maternal serum visfatin at 11-13 weeks' gestation in preeclampsia                                                                                                 | Case-control study             |
| [128] | Zorba, E., et al.           | 2012 | Visfatin serum levels are increased in women with preeclampsia: A case-control study                                                                              | Case-control study             |

|       |                            |      |                                                                                                                                                                                                                |                          |
|-------|----------------------------|------|----------------------------------------------------------------------------------------------------------------------------------------------------------------------------------------------------------------|--------------------------|
| [129] | Shaheen, A., et al.        | 2022 | Relationship of serum visfatin levels with serum electrolytes, liver profile, hepatic enzymes and anthropometric parameters in pregnant women with preeclampsia and eclampsia during 3 <sup>rd</sup> trimester | Cross-sectional study    |
| [130] | Amiri-Dashatan, N., et al. | 2020 | Association between circulating visfatin and pre-eclampsia: a systematic review and meta-analysis                                                                                                              | Meta-analysis            |
| [132] | Estrada-Zúñiga, C., et al. | 2019 | Are cord blood visfatin concentrations different depending on birth weight category?,                                                                                                                          | Cohort study             |
| [133] | Shemi, M., et al.          | 2016 | Effect of intrauterine growth pattern on serum visfatin concentrations in full-term infants at birth and at 6 months of life                                                                                   | Prospective cohort study |
| [135] | Kralisch, S., et al.       | 2018 | The brown-fat-secreted adipokine neuregulin 4 is decreased in gestational diabetes mellitus                                                                                                                    | Case-control study       |
| [136] | Kurek Eken M., et al.      | 2018 | Clinical significance of neuregulin 4 (NRG4) in gestational diabetes mellitus                                                                                                                                  | Cross-sectional study    |
| [137] | Yakut, K., et al.          | 2022 | Comparison of maternal serum NRG-4 levels in healthy and preeclamptic pregnancies                                                                                                                              | Cohort study             |
| [139] | Açikgöz, A., et al.        | 2016 | Evaluation of maternal serum progranulin levels in normotensive pregnancies, and pregnancies with early- and late-onset preeclampsia                                                                           | Cross-sectional study    |
